# Supplementary material
Source: Research Square preprint supplement (doi:10.21203/rs.3.rs-9305945/v1)
Supplement: Supplementary file 1 [file 042edf79eec17725c40d182b.xlsx]

## Sheet: S1
Class	Sensitivity	Specificity	Pos Pred Value	Balanced Accuracy	F1
FIN	1	1	1	1	1
GIH	1	1	1	1	1
LWK	1	1	1	1	1
PEL	1	1	1	1	1
JPT	0.990476	1	1	0.995238	0.995215
GBR	1	0.997221	0.94804	0.99861	0.973327
PUR	0.942342	0.999902	0.998092	0.971122	0.969416
CLM	0.933645	1	1	0.966822	0.965684
MXL	0.916935	0.997735	0.961116	0.957335	0.938506
CDX	0.953	0.986277	0.77166	0.969639	0.852796
YRI	0.853439	0.984588	0.841858	0.919014	0.847609
KHV	0.767769	0.996067	0.920714	0.881918	0.837314
TSI	1	0.967352	0.626749	0.983676	0.770554
IBS	0.630667	0.998254	0.964322	0.814461	0.762596
CHB	0.972222	0.956473	0.540958	0.964348	0.695134
ASW	0.463462	0.998635	0.945098	0.731048	0.621935
ACB	0.761765	0.964394	0.515252	0.863079	0.614715
CHS	0.421569	0.99995	0.998452	0.710759	0.592831
Supplementary Table 1: KNN per-class performance metrics in internal cross-validation.
