# Supplementary material
Source: Research Square preprint supplement (doi:10.21203/rs.3.rs-9305945/v1)
Supplement: Supplementary file 2 [file 2c7da48eaf6c61f119a61272.xlsx]

## Sheet: S3
Class	Sensitivity	Specificity	Pos Pred Value	Balanced Accuracy	F1
FIN	1	1	1	1	1
GBR	1	1	1	1	1
GIH	1	1	1	1	1
LWK	1	1	1	1	1
PEL	1	1	1	1	1
TSI	1	0.999902	0.998217	0.999951	0.999108
CLM	1	0.999854	0.997204	0.999927	0.9986
IBS	0.998667	0.999501	0.993369	0.999084	0.996011
YRI	1	0.999084	0.990566	0.999542	0.995261
JPT	0.990476	1	1	0.995238	0.995215
PUR	0.988288	1	1	0.994144	0.99411
MXL	0.991935	0.999409	0.990338	0.995672	0.991136
KHV	0.993388	0.99528	0.92604	0.994334	0.958533
CDX	0.92	0.999611	0.991379	0.959805	0.954357
CHS	0.979739	0.990759	0.890143	0.985249	0.932794
ACB	0.956863	0.993424	0.878488	0.975144	0.916002
ASW	0.858654	0.998245	0.961249	0.928449	0.907059
CHB	0.80463	0.997509	0.944565	0.901069	0.869
Supplementary Table 3: Random Forest per-class performance metrics in internal cross-validation.
