# Supplementary material
Source: Research Square preprint supplement (doi:10.21203/rs.3.rs-9305945/v1)
Supplement: Supplementary file 3 [file 5abb3507551eb24d97ee6fb0.xlsx]

## Sheet: S4
Class	Sensitivity	Specificity	Pos Pred Value	F1
CHB	0.522727	1	1	0.686567
GBR	0.821429	1	1	0.901961
IBS	1	0.980263	0.888889	0.941176
JPT	1	1	1	1
LWK	1	1	1	1
TSI	1	0.987179	0.909091	0.952381
YRI	1	1	1	1
Supplementary Table 4: Random Forest per-class performance metrics in external HGDP test set.
