# Supplementary material
Source: Research Square preprint supplement (doi:10.21203/rs.3.rs-9305945/v1)
Supplement: Supplementary file 4 [file 6986684c19b843da834cceec.xlsx]

## Sheet: S5
Method	Africa	East Asia	South Asia	Europe	America	Others
kNN	2.7	3	2.1	91.6	0.6	NA
RF	0.8	1.9	2.8	94	0.5	NA
Admixture (K=4)	2.4	2.4		95.1	0.1	NA
Admixture (K=7)	3.1	3	2.2	91.4	0.1	0.2
PANE	2.3	3	2.2	90.6	0.1	1.8
Supplementary Table 5: Percentage of Continental ancestry in the openSNP dataset inferred using four different methods
