# Supplementary material
Source: Research Square preprint supplement (doi:10.21203/rs.3.rs-9305945/v1)
Supplement: Supplementary file 5 [file d36053d873107c58c530b93e.xlsx]

## Sheet: S2
Class	Sensitivity	Specificity	Pos Pred Value	F1
CHB	0.795455	1	1	0.886076
GBR	0.75	1	1	0.857143
IBS	1	1	1	1
JPT	1	1	1	1
LWK	1	1	1	1
TSI	1	0.955128	0.740741	0.851064
YRI	0.52381	1	1	0.6875
Supplementary Table 2: KNN per-class performance metrics in external HGDP test set.
